# Supplementary material for: A Synthetic Cyclized Antimicrobial Peptide with Potent Effects against Drug-Resistant Skin Pathogens
Source: PubMed Central journal article supplement (PMC10186370; doi:10.1021/acsinfecdis.2c00598), 2023-05-03
Supplement: id2c00598_si_001.pdf [file id2c00598_si_001.pdf]

## Supporting Information

### **A synthetic cyclized antimicrobial peptide with potent effects against drug resistant skin pathogens**

John Kerr White<sup>1,2</sup>, Soumitra Mohanty<sup>1,2,3</sup>, Taj Muhammad<sup>3,4</sup>, Magdalena de Arriba Sanchez de la Campa<sup>1,2</sup>, Wael E. Houssen<sup>4,5</sup>, Natalia Ferraz<sup>6</sup>, Ulf Göransson<sup>3</sup>, Annelie Brauner<sup>1,2\*</sup>

<sup>1</sup> Department of Microbiology, Tumor and Cell Biology, Karolinska Institutet, SE-171 77 Stockholm, Sweden.

<sup>2</sup> Division of Clinical Microbiology, Karolinska University Hospital, SE-171 76 Stockholm, Sweden.

<sup>3</sup> Pharmacognosy, Department of Pharmaceutical Biosciences, Uppsala University, Biomedical Centre, Box 591 SE-75124 Uppsala, Sweden

<sup>4</sup> Institute of Medical Sciences, University of Aberdeen, Ashgrove Road West, Foresterhill Aberdeen AB25 2ZD, UK

<sup>5</sup> Department of Chemistry, University of Aberdeen, Meston Walk, Aberdeen AB24 3UE, UK.

<sup>6</sup> Nanotechnology and Functional Materials, Department of Materials Science and Engineering, Uppsala University, Box 35, SE-75103 Uppsala, Sweden

\* Corresponding author

Annelie Brauner, Department of Microbiology, Tumour and Cell Biology, Division of Clinical Microbiology, Karolinska Institutet and Karolinska University Hospital, 17176 Stockholm, Sweden; Phone +46 8 51770000, Fax: +46 8 308099 E-mail:

Annelie.Brauner@ki.se

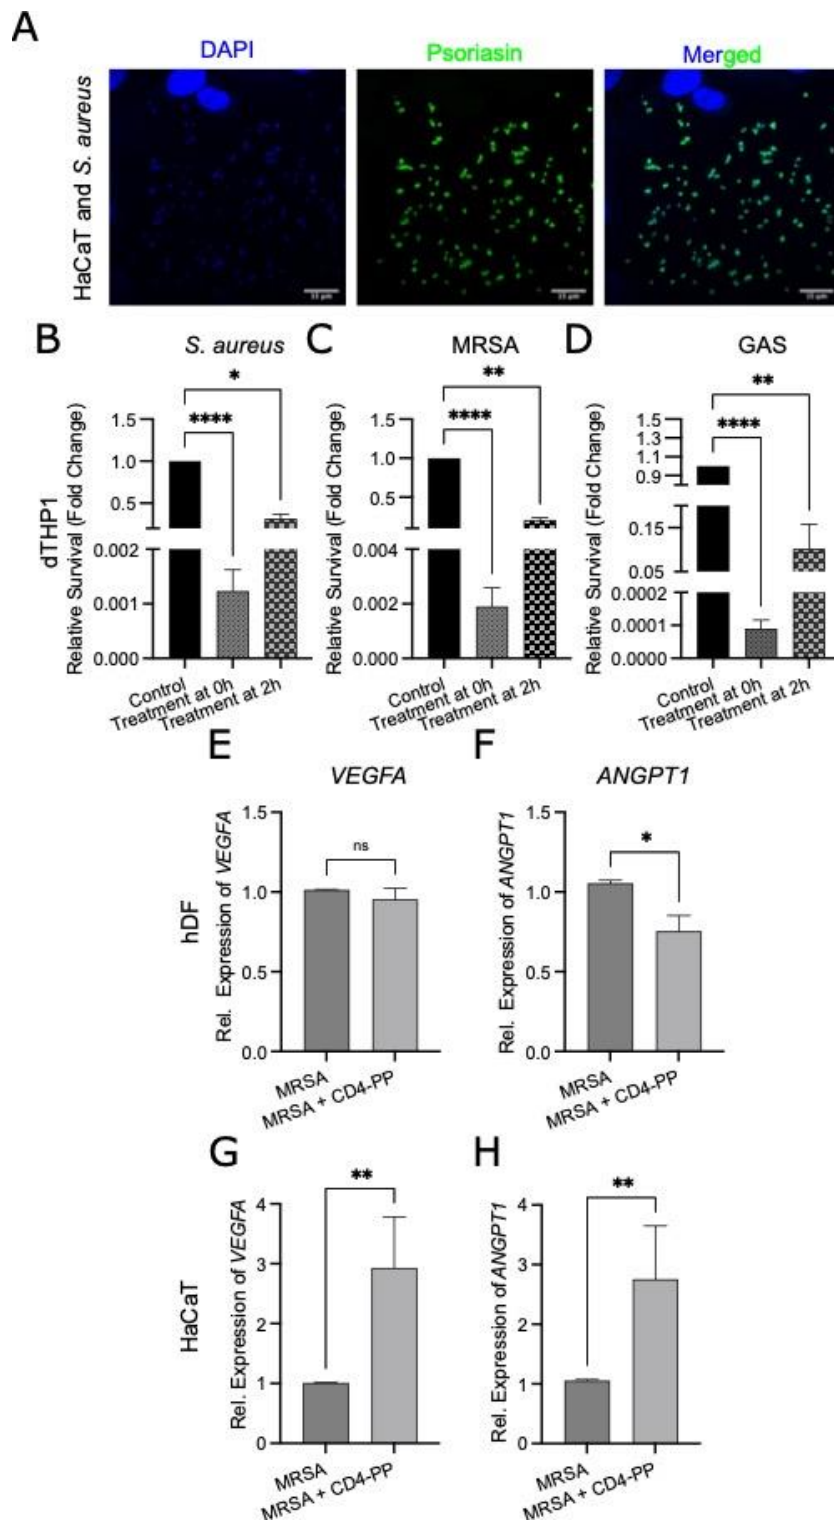

Figure S1

Representative image of keratinocytes infected with *S. aureus* depicting psoriasin peptide released from keratinocytes co-localising with *S. aureus*. Survival of skin pathogens (B) *S. aureus* (ATCC 29213), (C) MRSA (CCUG 31966), and (D) GAS (ATCC 19615) after infecting macrophages (dTHP1s).

Survival in treatment groups is relative to untreated control. CD4-PP was initiated at the same time as infection (Treatment at 0 h) or after 2 h of infection (Treatment after 2 h). Influence of CD4-PP on the gene expression of VEGFA and ANGPT1 in human dermal fibroblasts (hDF) and keratinocytes (HaCaT), infected with MRSA (CCUG 31966, E-H)  $p < 0.05$ , paired t-test.
